# Supplementary material for: Dispersion of the HIV-1 Epidemic in Men Who Have Sex with Men in the Netherlands: A Combined Mathematical Model and Phylogenetic Analysis
Source: PubMed Central journal article supplement (PMC4631366; doi:10.1371/journal.pmed.1001898), 2015-11-03

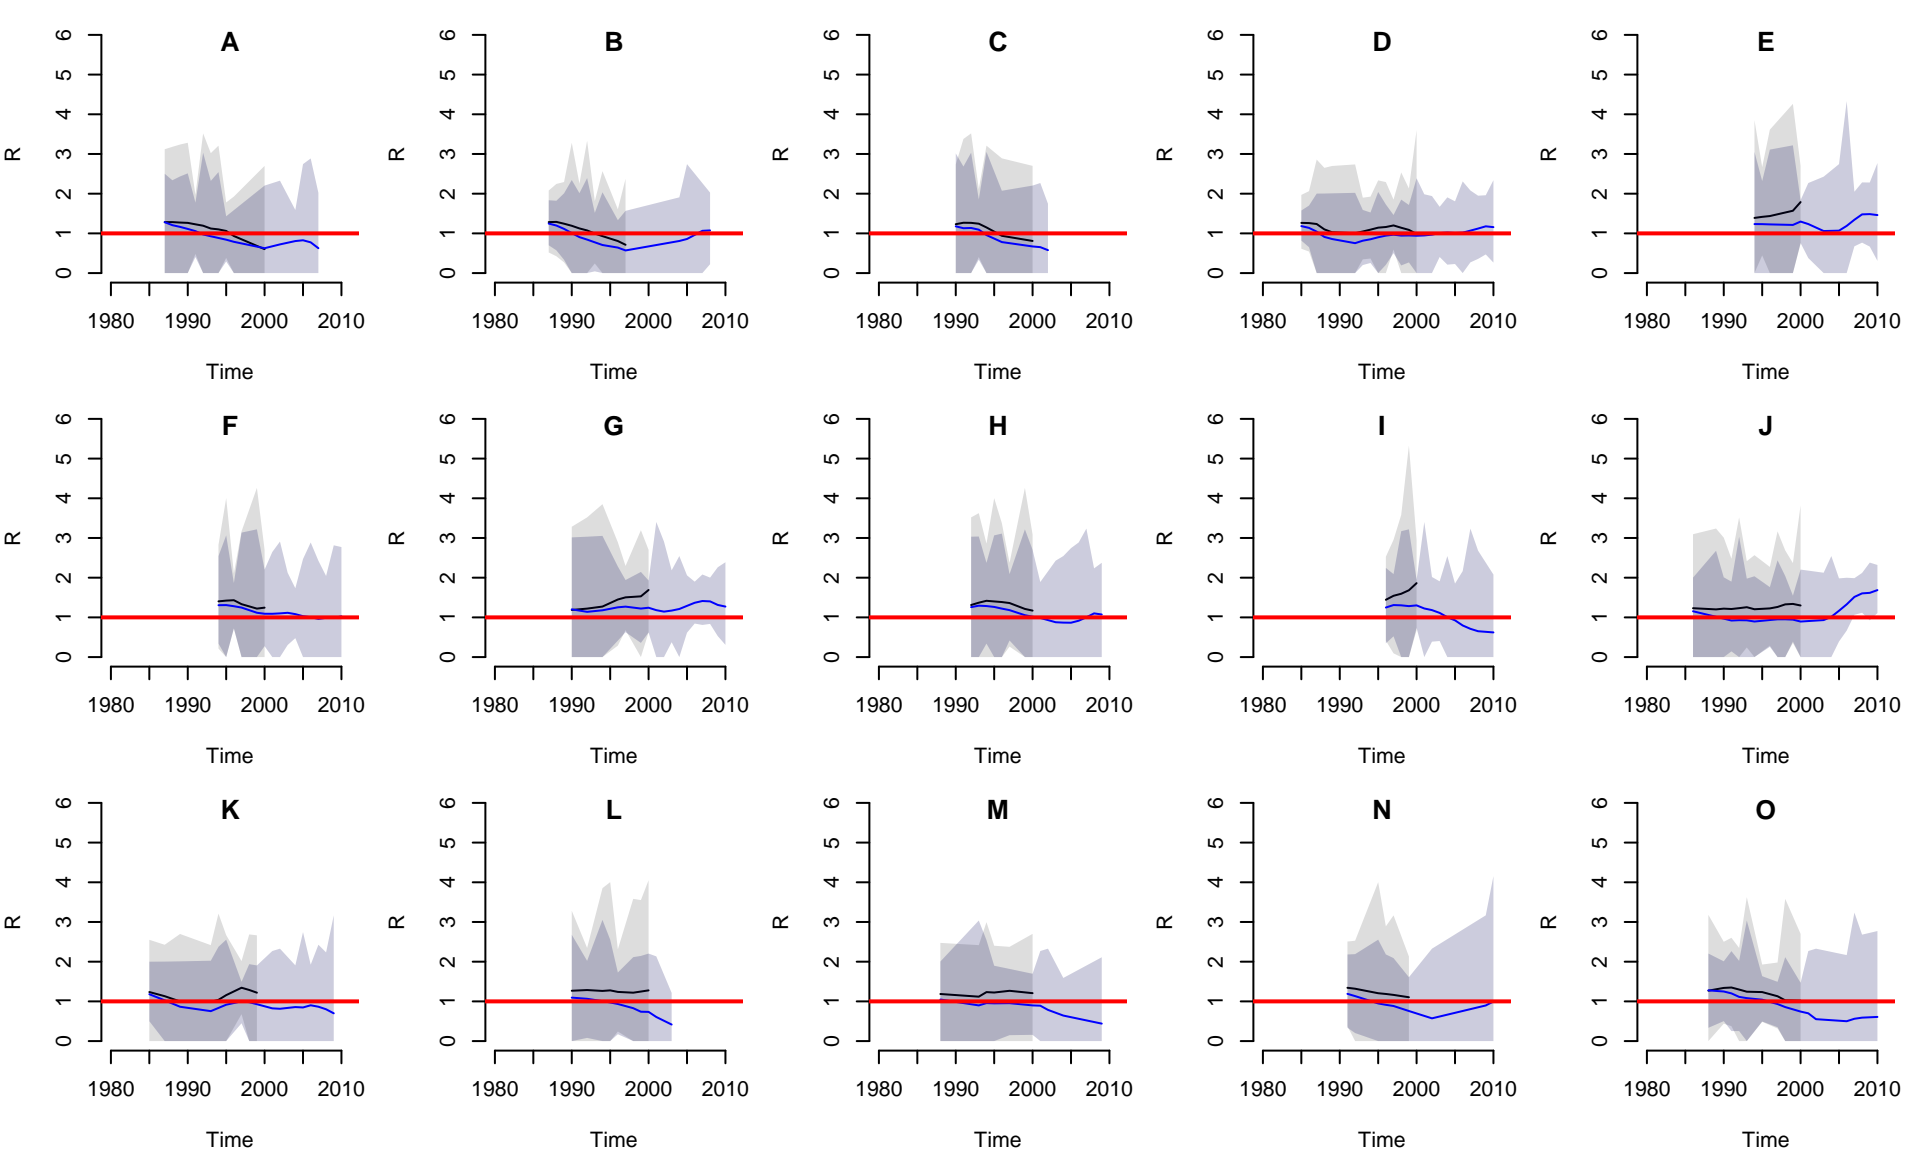

Supplement: pmed.1001898.s004.pdf [file pmed.1001898.s004.pdf]
