# Supplementary material for: Dispersion of the HIV-1 Epidemic in Men Who Have Sex with Men in the Netherlands: A Combined Mathematical Model and Phylogenetic Analysis
Source: PubMed Central journal article supplement (PMC4631366; doi:10.1371/journal.pmed.1001898), 2015-11-03
Supplement: pmed.1001898.s009.pdf [file pmed.1001898.s009.pdf]

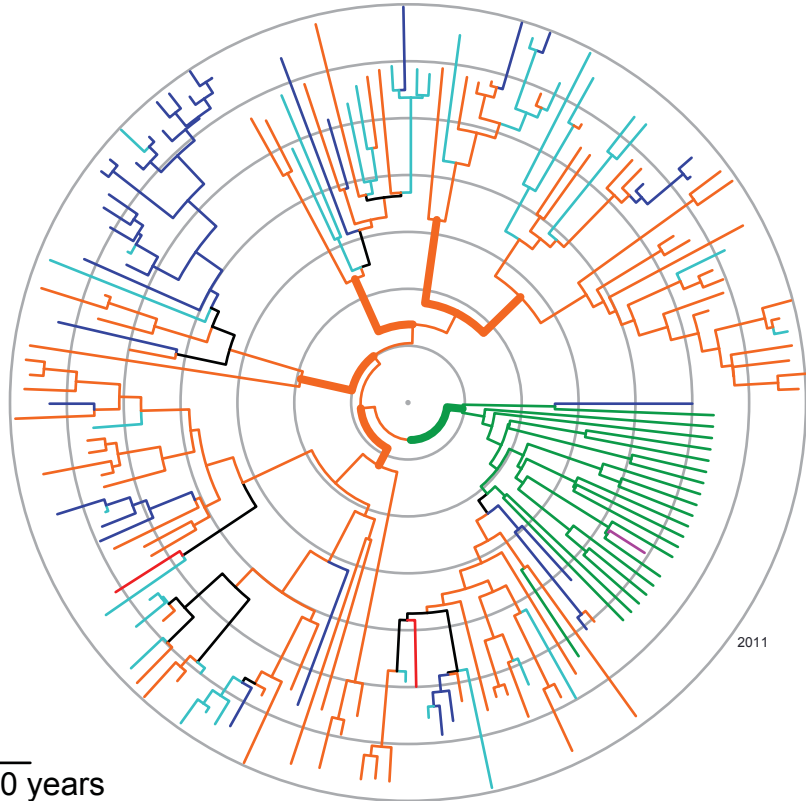

4.0 years

Sample site:

- Curaçao
- Netherlands
- Netherlands - Born in former Dutch Antilles
- Honduras - Los Alamos sequence
- Unites States - Los Alamos sequence

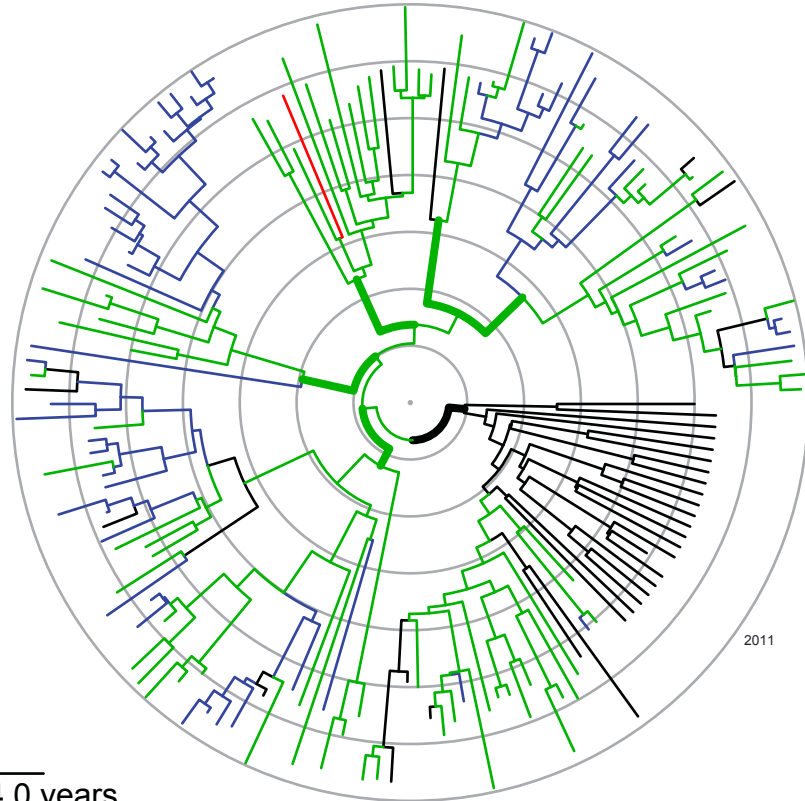

4.0 years

Transmission risk group:

- HT
- MSM
- PWID
- Unknown
