# Supplementary material for: Dispersion of the HIV-1 Epidemic in Men Who Have Sex with Men in the Netherlands: A Combined Mathematical Model and Phylogenetic Analysis
Source: PubMed Central journal article supplement (PMC4631366; doi:10.1371/journal.pmed.1001898), 2015-11-03

**Poisson offspring distribution  
mean R=1**

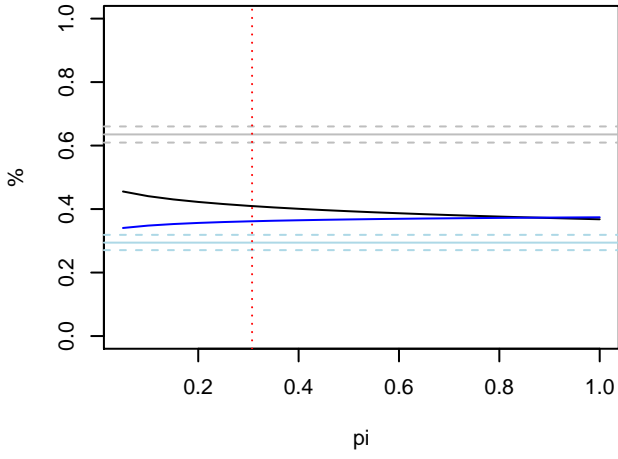

**Geometric offspring distribution  
mean R=1**

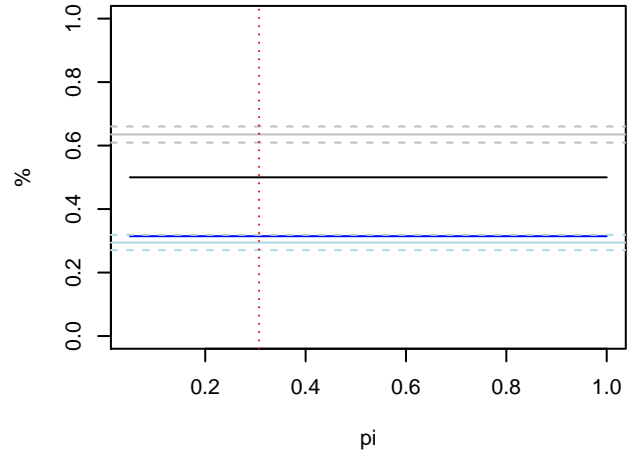

**Poisson offspring distribution  
mean R=0.9**

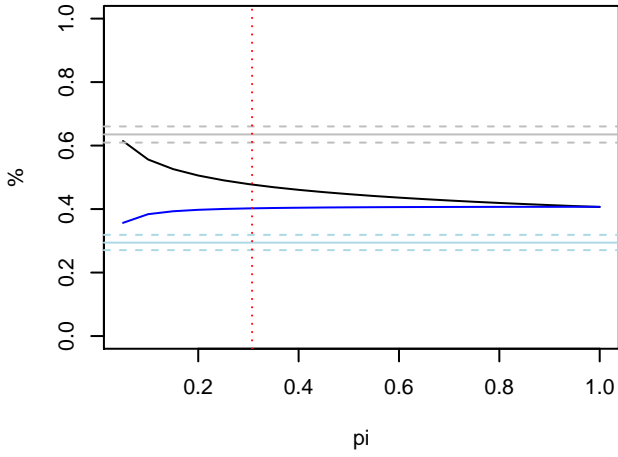

**Geometric offspring distribution  
mean R=0.9**

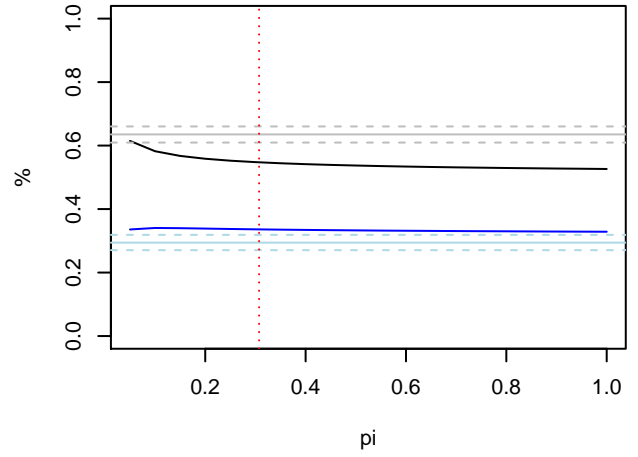

**Poisson offspring distribution  
mean R=1.1**

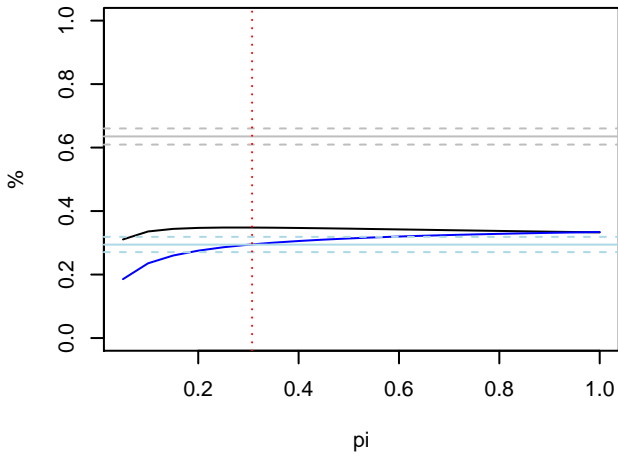

**Geometric offspring distribution  
mean R=1.1**

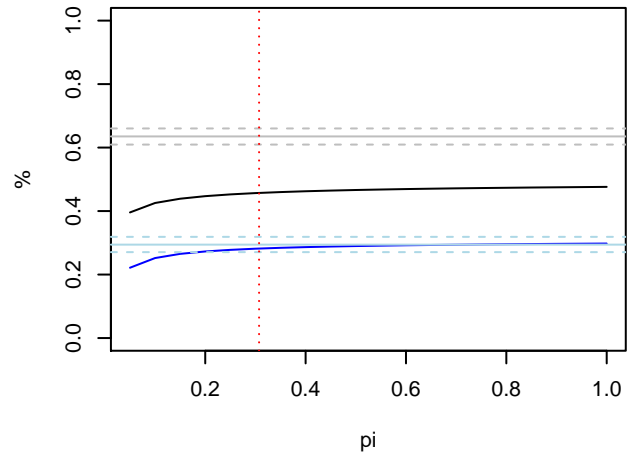

**Poisson offspring distribution  
pi=0.3**

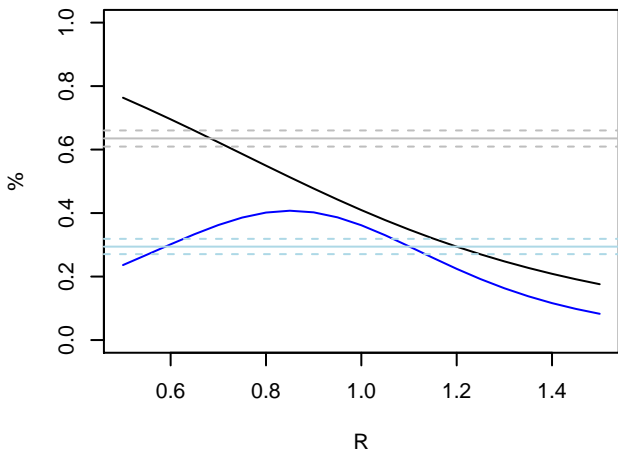

**Geometric offspring distribution  
pi=0.3**

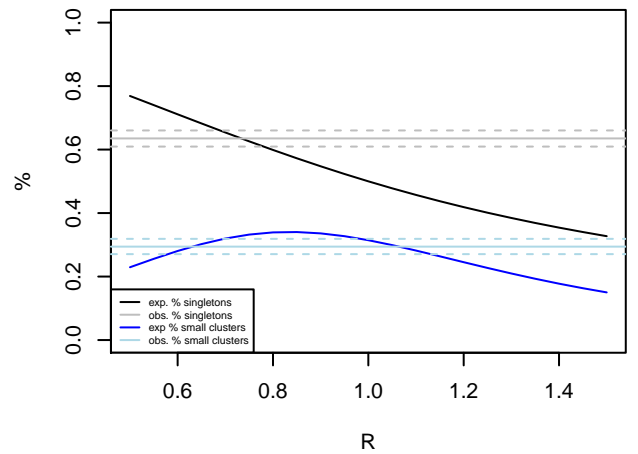

Supplement: pmed.1001898.s010.pdf [file pmed.1001898.s010.pdf]
