# Supplementary material for: Dispersion of the HIV-1 Epidemic in Men Who Have Sex with Men in the Netherlands: A Combined Mathematical Model and Phylogenetic Analysis
Source: PubMed Central journal article supplement (PMC4631366; doi:10.1371/journal.pmed.1001898), 2015-11-03
Supplement: pmed.1001898.s011.pdf [file pmed.1001898.s011.pdf]

| <b>Risk group / Country</b> | <b>N</b> | <b>MC (95% HPD)</b> | <b>P-value</b>   |
|-----------------------------|----------|---------------------|------------------|
| UNITED STATES               | 38       | 7.1 (4-12)          | <b>&lt;0.001</b> |
| SPAIN                       | 13       | 2.0 (2-2)           | <b>0.018</b>     |
| GERMANY                     | 9        | 1.0 (1-1)           | 1                |
| ITALY                       | 91       | 2.0 (1-3)           | 0.253            |
| SENEGAL                     | 3        | 1.2 (1-2)           | 1                |
| FRANCE                      | 4        | 1 (1-1)             | 1                |
| CANADA                      | 2        | 1 (1-1)             | 1                |
| ARGENTINA                   | 7        | 2.0 (2-2)           | <b>0.003</b>     |
| CZECH REPUBLIC              | 1        | 1 (1-1)             | 1                |
| PWID                        | 136      | 6.2 (6-7)           | <b>0.004</b>     |
| IRELAND                     | 1        | 1 (1-1)             | 1                |
| BELGIUM                     | 2        | 1 (1-1)             | 1                |
| DENMARK                     | 1        | 1 (1-1)             | 1                |
| AUSTRIA                     | 1        | 1 (1-1)             | 1                |
| SWITZERLAND                 | 10       | 2.0 (2-2)           | <b>0.015</b>     |
| UNITED KINGDOM              | 12       | 2.6 (2-3)           | <b>&lt;0.001</b> |
| MSM                         | 24       | 1.7 (1-2)           | 0.105            |
| Heterosexual                | 122      | (8-9)               | <b>&lt;0.001</b> |
