# Supplementary material for: Dispersion of the HIV-1 Epidemic in Men Who Have Sex with Men in the Netherlands: A Combined Mathematical Model and Phylogenetic Analysis
Source: PLoS Med. 2015 Nov 3;12(11):e1001898. doi: 10.1371/journal.pmed.1001898 (PMC4631366; doi:10.1371/journal.pmed.1001898)
Supplement: S2 Table — (XLS) [file pmed.1001898.s012.xls]

## Sheet: mrca_inf
clustername	duration	tree	time of MRCA	95%HPD		yearfd	yearseqfd	MeanR
189	4.80438	MSM1	1995.03	1990.82	1998.91	2004	2004	1.61943		clustername	name of the cluster as in the timed trees
10560	5.05335	MSM8	1993.56	1981.41	1995.26	2005	2005	1.67796		duration	time between the first and last date of diagnosis in a cluster
2531	5.40082	MSM2	1998.98	1991.21	2000.28	2005	2005	1.61469		tree	name of the correspondend timed tree
12237	5.78386	MSM8	1994.41	1988.72	1999.85	2004	2006	1.56153		MRCA	most recent common ancestor
7056	5.9617	MSM6	1993.93	1989.26	1998.28	2003	2003	1.49885		95%HPD	95% Highest Posterior Density interval
1127	6.0301	MSM1	1999.71	1994.35	2000.73	2004	2004	1.60634		yearfd	year of the first person diagnosed in a cluster
12168	6.30643	MSM8	1999.35	1997.13	2005.16	2004	2005	1.52863		yearseqfd	year of the sample used for sequencing of the first diagnosed person in a cluster
447	6.47059	MSM1	2002.51	1999.61	2003.77	2004	2004	1.76067		MeanR	the estimated mean reproduction number over the last 5 years
3071	6.96033	MSM2	1999.26	1995.09	2003.11	2003	2003	1.41978
5963	7.18468	MSM5	1986.9	1982.2	1992.34	2003	2003	1.5227
5033	7.24487	MSM4	1995.62	1990.35	1996.46	2002	2008	1.33766
4477	7.29685	MSM4	1998.4	1992.35	1999.38	2003	2003	1.66365
10231	7.83858	MSM8	1980.15	1979.2	1991.77	2002	2002	1.34104
9042	7.95349	MSM7	1996.76	1986.66	1997.07	2002	2003	1.57426
13343	7.9617	MSM9	1993.67	1988.49	1997.88	2000	2000	1.13943
14569	7.9699	MSM10	1994.41	1992.76	1999.6	2002	2003	1.54083
6513	8.03283	MSM5	1996.24	1993.09	2000.21	2002	2004	1.52555
8257	8.34747	MSM7	1996.47	1997.22	2002.29	2002	2002	1.74719
7703	8.35568	MSM6	1993.63	1989.15	1997.59	2001	2003	1.46276
4693	8.487	MSM4	1999.48	1994.98	2001.09	2001	2007	1.39409
2721	8.91655	MSM2	2001.87	1996.34	2002.45	2001	2002	1.72589
9142	9.16005	MSM7	1998.45	1992.04	1999.35	2001	2001	1.08733
16138	9.20109	MSM10	1987.38	1982.27	1992.23	2001	2001	1.28699
5699	9.3762	MSM5	1982.11	1979.26	1987.95	2001	2003	1.46248
5938	10.0766	MSM5	1990.23	1983.49	1998.3	2000	2004	1.52591
10912	10.1149	MSMdc	1982.16	1974.13	1986.64	2000	2000	1.47815
11335	10.1614	MSM8	1986.69	1980.49	1993.26	2000	2008	1.22706
14061	10.3365	MSM10	1989.29	1986.66	1997.17	1999	2003	1.55471
1840	10.974	MSM1	1988.35	1986.14	1992.44	1999	1999	1.15731
2602	10.974	MSM2	1997.42	1992.41	1999.3	1999	2000	1.07348
8368	11.1491	MSM7	1990.64	1985.1	1994.91	1999	1999	1.55778
5492	11.2476	MSM5	1993.1	1988.91	1998.42	1997	2006	1.41682
6869	12.0848	MSM6	1991.96	1988.32	1995.62	1998	1998	1.61315
1507	12.6156	MSM1	1991.68	1988.26	1995.62	1998	2002	1.4655
4746	12.7059	MSM4	1997.58	1992	1996.82	1998	1998	1.31618
1571	13.1026	MSM1	1994.4	1990.7	1997.95	1994	2001	1.06534
3259	13.3653	MSM2	1989.91	1987.71	1995.12	1997	2002	1.49115
13533	14.3666	MSM9	1988.59	1983.18	1991.86	1996	1999	1.58901
1667	14.6101	MSM1	1989.92	1985.1	1990.86	1995	1999	0.910564
3420	14.9056	MSM3	1991.62	1986.65	1993.76	1995	1997	1.43871
12399	15.026	MSM9	1981.63	1978.64	1985.09	1987	1996	0.508585
5296	15.0287	MSM4	1994.25	1988.87	1993.96	1990	2007	0.852139
6602	15.2011	MSM5	1991.9	1990.18	1996.17	1995	1996	1.58637
7770	15.3653	MSM6	1987.28	1984.04	1990.48	1995	2005	1.39099
11744	15.3653	MSM8	1986.32	1980.05	1989.06	1995	2002	1.11799
3980	15.4145	MSM3	1992.88	1989.49	1995.85	1995	1998	1.63044
12884	15.4911	MSM9	1977.18	1975.9	1983.19	1995	2000	1.23621
2927	15.6416	MSM2	1992.65	1988.31	1994.52	1994	1999	0.818396
3113	15.6963	MSM2	1989.36	1987.01	1992.73	1994	2000	1.19216
10001	15.8358	MSM7	1989.75	1985.01	1992.1	1994	2001	1.2496
14691	15.9672	MSM10	1981.06	1983.02	1991.13	1994	2001	0.89291
1951	15.9891	MSM1	1987.83	1985.64	1991.58	1992	1996	0.907945
12579	16.9521	MSM9	1980.29	1977.93	1985.69	1993	1993	1.17275
6190	17.0643	MSMdc	1980.86	1973.97	1983.39	1993	1999	0.810056
10105	17.0999	MSM8	1978.08	1975.98	1983.76	1986	1996	0.40216
14008	17.2285	MSM10	1980.75	1980.85	1988.26	1992	2002	0.836441
13098	17.42	MSM9	1980.74	1979.16	1986.8	1989	2005	0.847561
12476	18.041	MSM9	1988.1	1982.99	1991.21	1992	2007	0.715492
8631	18.2353	MSM7	1987.69	1982.13	1989.31	1992	2002	1.05512
13744	18.238	MSM10	1988.61	1982.31	1992.29	1992	2003	1.62381
4572	18.383	MSM4	1994.42	1990.73	1996.03	1992	2001	1.64721
8101	18.4706	MSM6	1986.47	1983.15	1988.96	1992	2001	1.00038
11075	18.5499	MSM8	1983.78	1980.4	1991.09	1990	2002	1.16368
2760	19.1765	MSM2	1994.8	1990.05	1999.21	1991	2009	1.56259
921	19.1792	MSM1	1993.65	1990.33	1997.12	1991	2004	1.19869
12300	19.2476	MSM9	1988.08	1984.4	1991.08	1990	2003	1.06522
10337	19.4802	MSM8	1977.06	1974.21	1982.71	1989	2002	0.897702
113	20.1505	MSM1	1987.91	1983.94	1990.91	1989	1996	1.25606
2811	20.1505	MSM2	1988.03	1986.5	1993.02	1990	1995	1.68008
16645	20.5226	MSM10	1983.29	1980.75	1988.74	1989	1999	0.878844
5189	20.7715	MSM4	1994.05	1990.39	1994.83	1990	2002	1.45787
611	21.1929	MSM1	1989.49	1985.37	1992.94	1989	1998	1.46262
6642	21.2996	MSM6	1987.47	1984.07	1990.53	1986	1997	0.651456
5568	21.6908	MSM5	1979.42	1977.23	1985.74	1985	2002	0.683912
8688	21.9124	MSM7	1988.15	1982.46	1989.98	1988	2001	1.3859
2973	21.9261	MSM2	1992.81	1989.4	1995.9	1988	1997	1.51655
16539	22.435	MSM10	1981.14	1979.85	1986.34	1987	1992	0.640058
11141	22.9111	MSM8	1985.81	1980.36	1992.81	1987	2003	1.56358
15856	22.9412	MSM10	1984.41	1980.9	1987.43	1987	2001	0.95814
6042	23.0862	MSM5	1984.96	1982.21	1991.8	1986	1997	1.34674
9649	23.3926	MSM7	1984.68	1979.41	1986.29	1985	1997	1.09396
11169	23.6416	MSM8	1982.2	1978.52	1986.87	1985	1998	0.376716
7288	23.7428	MSM6	1988.01	1984.63	1991.47	1986	2003	1.23536
6258	24.0657	MSM5	1988.92	1981.41	1991.71	1984	2000	0.965782
16460	24.3721	MSM10	1982.14	1978.68	1986.69	1985	2000	0.928286
5382	25.357	MSM5	1982.04	1981.08	1985.77	1984	2009	0.835435
10774	25.6005	MSM8	1983.74	1980.96	1989.59	1985	2002	1.53272
3611	26.0164	MSM3	1988.19	1984.25	1990.25	1984	1994	1.56078
12723	26.4323	MSMdc	1979.64	1970.45	1981.07	1984	1996	1.11622
16207	26.8235	MSM10	1983.38	1980.42	1987.67	1983	2010	0.511764
5879	27.3434	MSM5	1981.64	1978.05	1985.21	1981	2004	0.959495
